# Supplementary material
Source: MDPI journal article supplement (https://www.mdpi.com/2073-4344/13/3/552)
Supplement: s1 [file s1]

# Supporting Information

## The Promotional Effect of Na on Ru for pH-Universal Hydrogen Evolution Reactions

Bingxin Guo<sup>1</sup>, Chengfei Zhao<sup>1</sup>, Yingshuang Zhou<sup>1</sup>, Junjie Guo<sup>2,\*</sup>, Zhongzhe Wei<sup>3,\*</sup> and Jing Wang<sup>1,\*</sup>

<sup>1</sup> College of Materials and Environmental Engineering, Institute of Advanced Magnetic Materials, Hangzhou Dianzi University, Hangzhou 310018, China; gbx@hdu.edu.cn (B.G.); zzz@hdu.edu.cn (C.Z.); ugu@hdu.edu.cn (Y.Z.)

<sup>2</sup> Key Laboratory of Interface Science and Engineering in Advanced Materials, Ministry of Education, Taiyuan University of Technology, Taiyuan 030024, China,

<sup>3</sup> Institute of Industrial Catalysis, College of Chemical Engineering, Zhejiang University of Technology, Hangzhou 310032, China,

\* Correspondence: jguo@hdu.edu.cn (J.G.); weizhze@zjut.edu.cn (Z.W.); chemwj@hdu.edu.cn (J.W.)

**Table S1.** Elemental content of Ru, Na measured by ICP-OES.

| Catalysts                   | Ru (wt%) | Na (wt%) |
|-----------------------------|----------|----------|
| Ru <sub>0.3</sub> /C-800    | 0.81     | 0.36     |
| Ru <sub>0.3</sub> /C-900    | 0.25     | 0.30     |
| Ru <sub>0.3</sub> /C-1000   | 0.11     | 0.004    |
| Ru <sub>0.3</sub> /C-800-WF | 0.28     | 0.03     |

**Table S2.** Ru<sup>0</sup>/Ru<sup>n+</sup> ratio of Ru<sub>0.3</sub>/C-800, Ru<sub>0.3</sub>/C-900, Ru<sub>0.3</sub>/C-1000 and Ru<sub>0.3</sub>/C-800-WF.

| Catalysts                   | Ru <sup>0</sup> /Ru <sup>n+</sup> |
|-----------------------------|-----------------------------------|
| Ru <sub>0.3</sub> /C-800    | 1.68                              |
| Ru <sub>0.3</sub> /C-900    | 1.23                              |
| Ru <sub>0.3</sub> /C-1000   | 1.18                              |
| Ru <sub>0.3</sub> /C-800-WF | 1.20                              |

**Table S3.** BET Surface Area (m<sup>2</sup>/g) of Ru<sub>0.3</sub>/C-700, Ru<sub>0.3</sub>/C-800, Ru<sub>0.3</sub>/C-900, Ru<sub>0.3</sub>/C-1000 and Ru<sub>0.3</sub>/C-800-WF.

| Catalysts                   | BET Surface Area<br>(m <sup>2</sup> /g) |
|-----------------------------|-----------------------------------------|
| Ru <sub>0.3</sub> /C-700    | 66.6                                    |
| Ru <sub>0.3</sub> /C-800    | 592.0                                   |
| Ru <sub>0.3</sub> /C-900    | 202.7                                   |
| Ru <sub>0.3</sub> /C-1000   | 91.6                                    |
| Ru <sub>0.3</sub> /C-800-WF | 362.9                                   |

**Table S4.**  $R_s$  and  $R_{ct}$  of Ru<sub>0.3</sub>/C-800, Ru<sub>0.3</sub>/C-900 and Ru<sub>0.3</sub>/C-1000 in 1.0 M KOH.

| Samples                               | Ru <sub>0.3</sub> /C-800 | Ru <sub>0.3</sub> /C-900 | Ru <sub>0.3</sub> /C-1000 |
|---------------------------------------|--------------------------|--------------------------|---------------------------|
| $R_s$ ( $\Omega$ cm <sup>2</sup> )    | 1.29                     | 1.91                     | 2.04                      |
| $R_{ct}$ ( $\Omega$ cm <sup>2</sup> ) | 21.80                    | 50.14                    | 116.00                    |

**Table S5.** Summary of the recently reported HER catalysts.

| Catalysts                                                   | 1.0 M KOH<br>- $\eta_{10}$ (mV) | 0.5 M H <sub>2</sub> SO <sub>4</sub><br>- $\eta_{10}$ (mV) | Content<br>(Ru) | References                                         |
|-------------------------------------------------------------|---------------------------------|------------------------------------------------------------|-----------------|----------------------------------------------------|
| Ru <sub>0.3</sub> /C-800                                    | 29                              | 83                                                         | 0.81 wt%        | this work                                          |
| h-RuNP                                                      | 75                              | 90                                                         | /               | <i>ACS Appl. Nano Mater.</i> 4 (2021) 8530–8538    |
| Ru@NGT                                                      | 75                              | /                                                          | 28 wt%          | <i>ACS Appl. Energy Mater.</i> 2 (2019) 7330–7339  |
| 2D-MoO <sub>2</sub> /Ru/N<br>C                              | 25                              | 68                                                         | 18.22 wt%       | <i>J. Phys. Chem. C.</i> 124 (2020) 10804–10814    |
| Ru/C-H <sub>2</sub> O/CH <sub>3</sub><br>CH <sub>2</sub> OH | 53                              | 35                                                         | 58.22 wt%       | <i>Appl. Catal. B Environ.</i> 258 (2019) 117952   |
| MSOR <sub>1</sub>                                           | 43                              | 197                                                        | 4.09 wt%        | <i>Adv. Funct. Mater.</i> 2210939 (2023) 1–12      |
| RuP <sub>2</sub> @NPC                                       | 52                              | 38                                                         | 23.3 wt%        | <i>Angew. Chem. Int. Ed.</i> 56 (2017) 11559–11564 |
| Ru@ENG                                                      | 47                              | /                                                          | 4.21 wt%        | <i>Nano Energy.</i> 76 (2020) 105114               |
| Ru@Co/N-CNTs                                                | 48                              | 92                                                         | /               | <i>ACS Sustain. Chem. Eng.</i> 8 (2020) 9136–9144  |

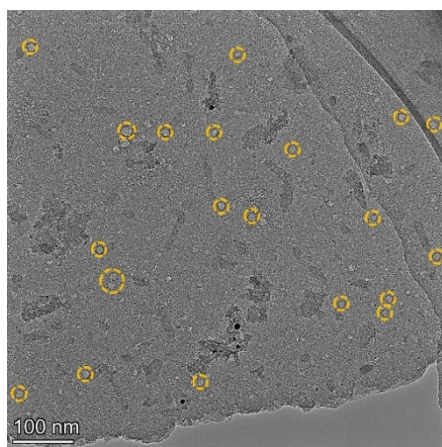

**Figure S1.** TEM image of  $\text{Ru}_{0.3}/\text{C}-800$ , the yellow circle is a pore structure, mainly mesopores.

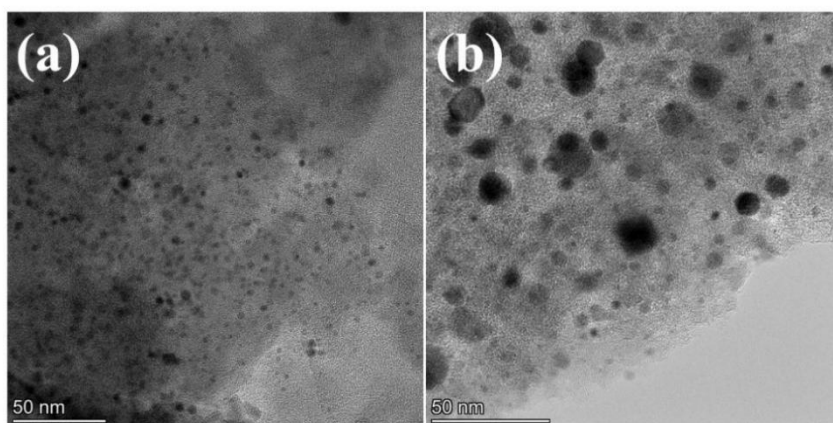

**Figure S2.** (a) TEM image of  $\text{Ru}_{0.2}/\text{C}-800$ . (b) TEM image of  $\text{Ru}_{0.4}/\text{C}-800$ .

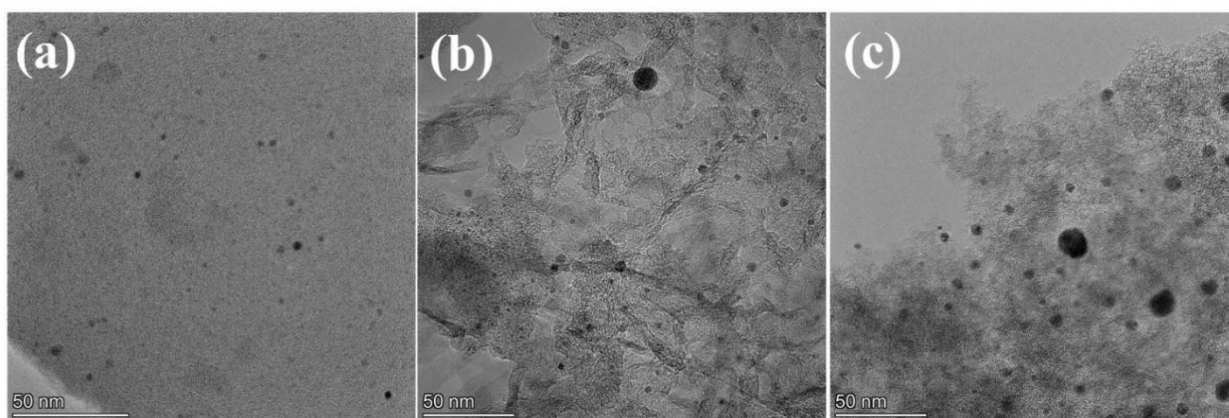

**Figure S3.** (a) TEM image of  $\text{Ru}_{0.3}/\text{C}-700$ . (b) TEM image of  $\text{Ru}_{0.3}/\text{C}-900$ . (c) TEM image of  $\text{Ru}_{0.3}/\text{C}-1000$ .

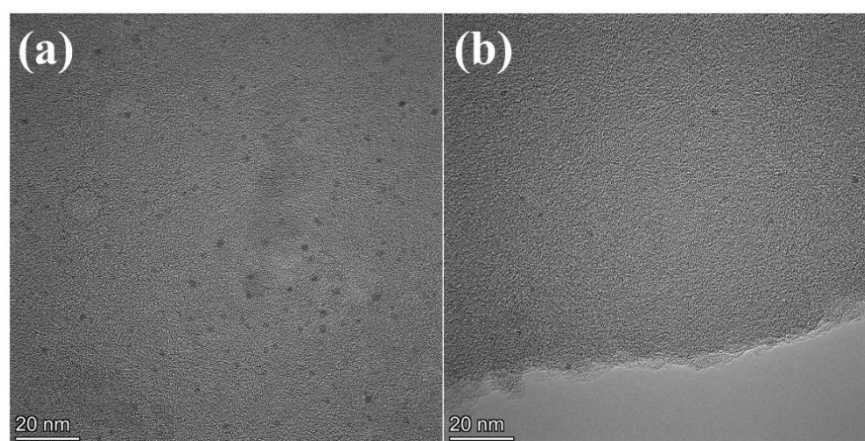

**Figure S4.** TEM image of (a) Ru<sub>0.3</sub>/C-800 and (b) Ru<sub>0.3</sub>/C-800-WF.

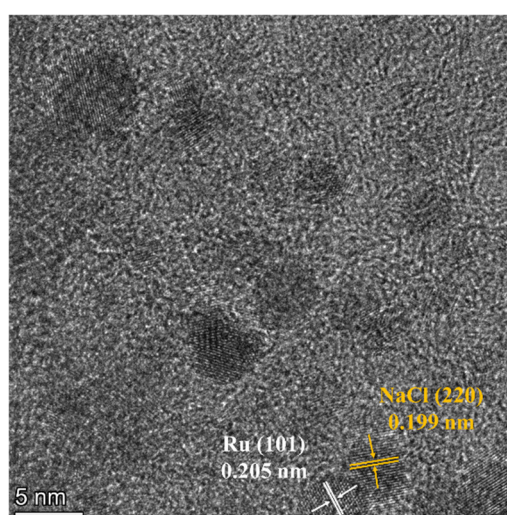

**Figure S5.** HRTEM of Ru<sub>0.3</sub>/C-800.

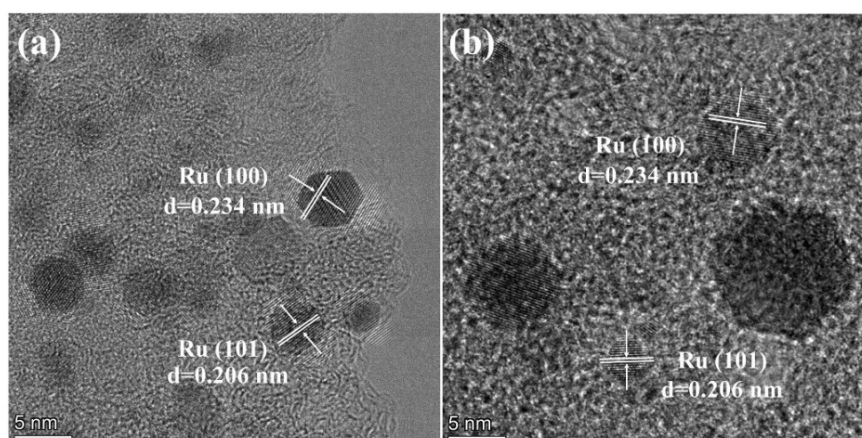

**Figure S6.** HRTEM image of (a) Ru<sub>0.3</sub>/C-800 and (b) Ru<sub>0.3</sub>/C-900.



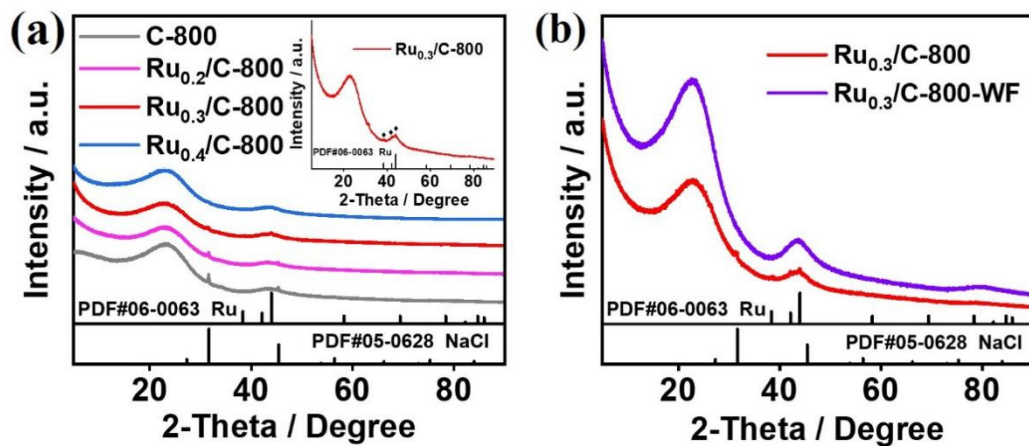

**Figure S7.** (a) XRD patterns of C-800, Ru<sub>0.2</sub>/C-800, Ru<sub>0.3</sub>/C-800 and Ru<sub>0.4</sub>/C-800, inset: XRD enlargement of Ru<sub>0.3</sub>/C-800. (b) XRD patterns of Ru<sub>0.3</sub>/C-800 and Ru<sub>0.3</sub>/C-800-WF.

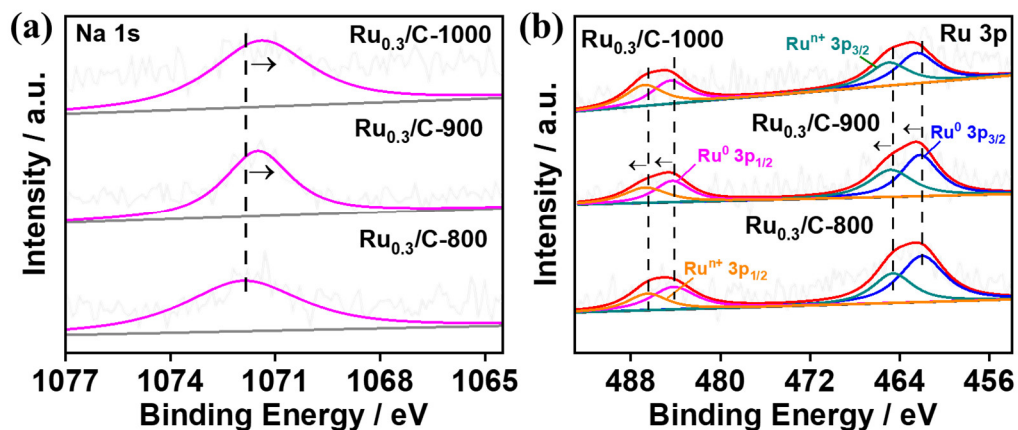

**Figure S8.** (a) High-resolution XPS spectra of Na 1s about Ru<sub>0.3</sub>/C-800, Ru<sub>0.3</sub>/C-900 and Ru<sub>0.3</sub>/C-1000. (b) High-resolution XPS spectra of Ru 3p about Ru<sub>0.3</sub>/C-800, Ru<sub>0.3</sub>/C-900 and Ru<sub>0.3</sub>/C-1000.

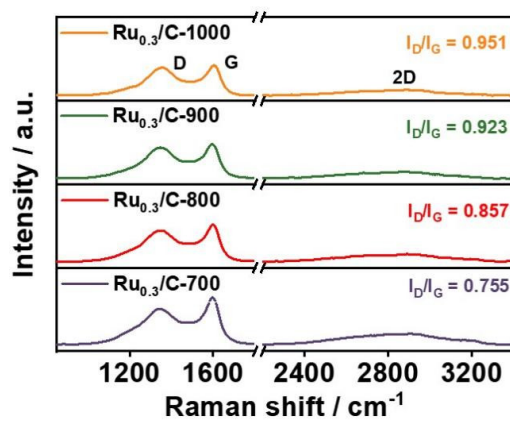

**Figure S9.** Raman spectra of Ru<sub>0.3</sub>/C-700, Ru<sub>0.3</sub>/C-800, Ru<sub>0.3</sub>/C-900 and Ru<sub>0.3</sub>/C-1000.

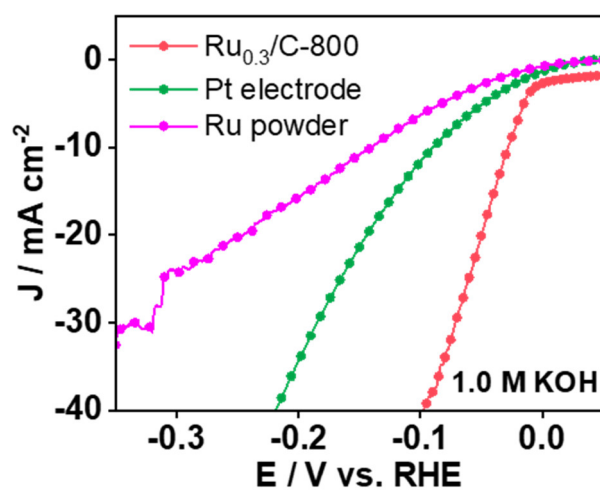

**Figure S10.** LSV curves of Ru powder, Pt electrode and Ru<sub>0.3</sub>/C-800 in 1.0 M KOH.

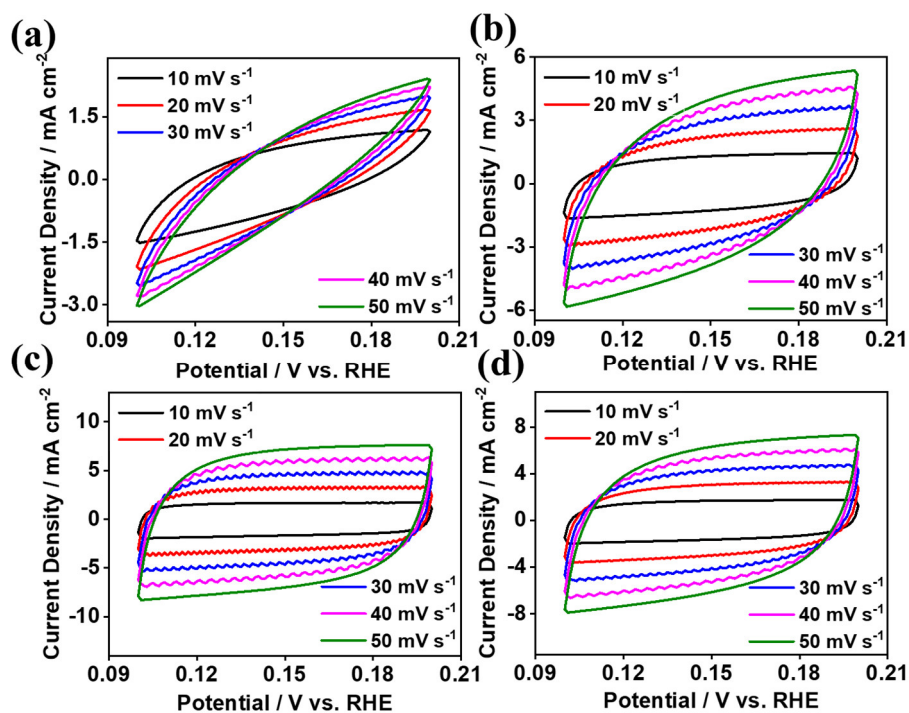

**Figure S11.** CV curves of (a) C-800, (b) Ru<sub>0.2</sub>/C-800, (c) Ru<sub>0.3</sub>/C-800 and (d) Ru<sub>0.4</sub>/C-800 at different scan rates: 10, 20, 30, 40, 50 mV s<sup>-1</sup> in 1.0 M KOH solution.

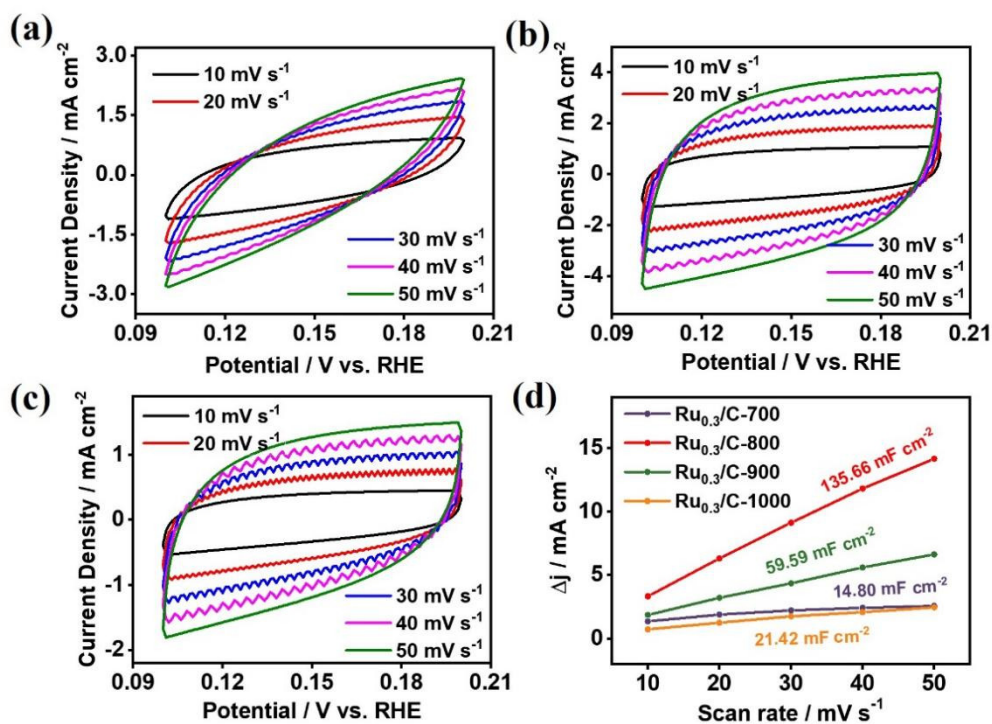

**Figure S12.** CV curves of (a) Ru<sub>0.3</sub>/C-700, (b) Ru<sub>0.3</sub>/C-900 and (c) Ru<sub>0.3</sub>/C-1000 at different scan rates: 10, 20, 30, 40, 50 mV s<sup>-1</sup> in 1.0 M KOH solution. (d) The linear plot of the capacitive current versus the scan rate for determination of the C<sub>dl</sub>.



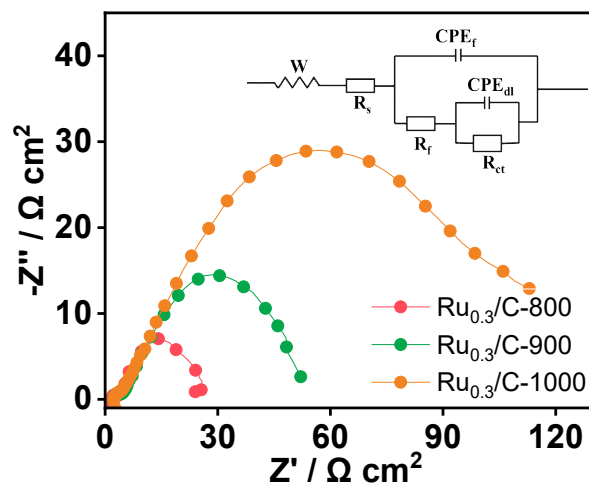

**Figure S13.** EIS spectra of Ru<sub>0.3</sub>/C-800, Ru<sub>0.3</sub>/C-900 and Ru<sub>0.3</sub>/C-1000. Inset: equivalent circuit models used for fitting the EIS response of HER.

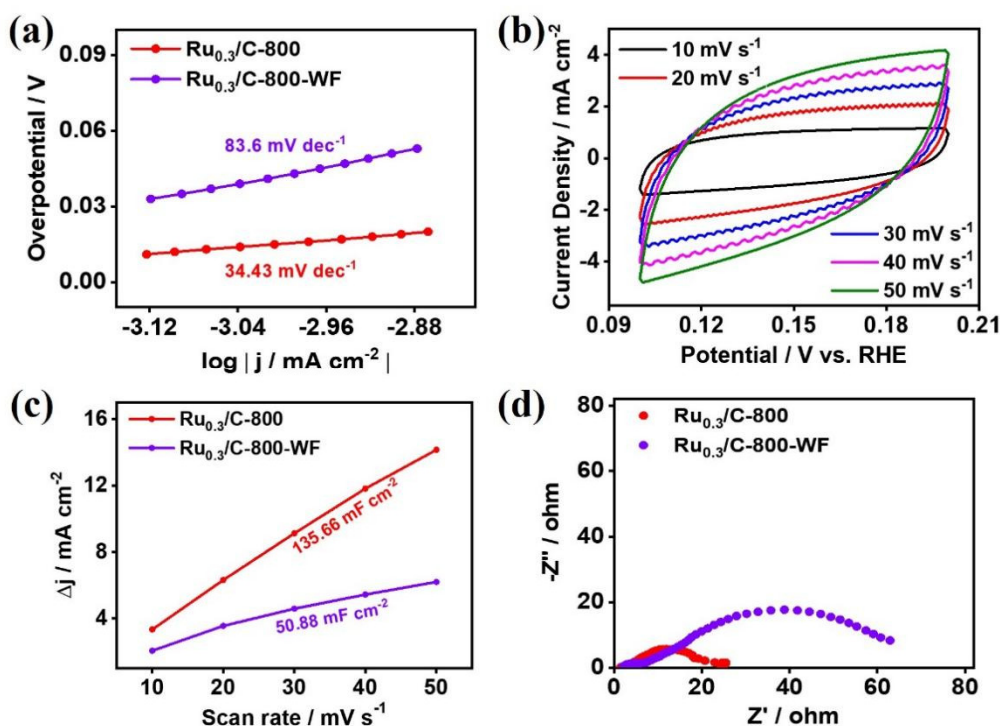

**Figure S14.** (a) Tafel plots of Ru<sub>0.3</sub>/C-800 and Ru<sub>0.3</sub>/C-800-WF. (b) CV curves of Ru<sub>0.3</sub>/C-800-WF at different scan rates: 10, 20, 30, 40, 50 mV s<sup>-1</sup> in 1.0 M KOH solution. (c) The linear plot of the capacitive current versus the scan rate for determination of the C<sub>dl</sub>. (d) Nyquist plots of Ru<sub>0.3</sub>/C-800 and Ru<sub>0.3</sub>/C-800-WF.

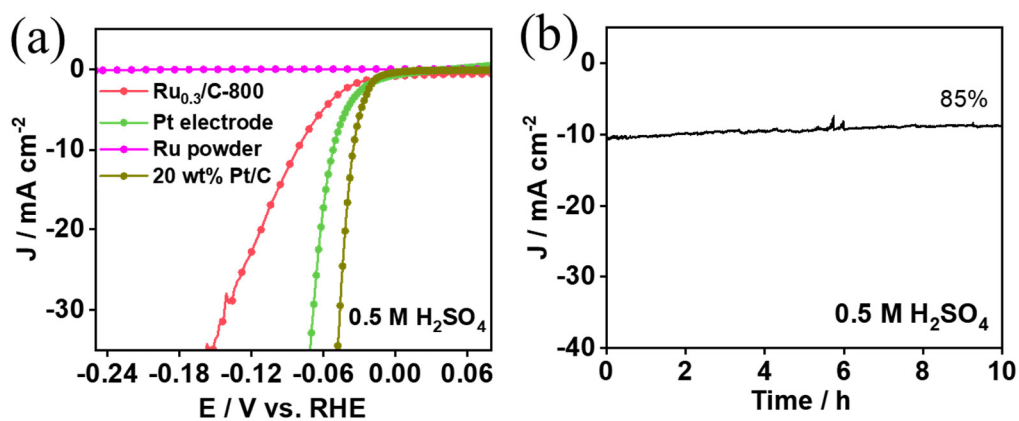

**Figure S15.** (a) LSV curves of Ru<sub>0.3</sub>/C-800, Ru powder, Pt electrode and 20 wt% Pt/C in 0.5 M H<sub>2</sub>SO<sub>4</sub>. (b) The i-t curve of Ru<sub>0.3</sub>/C-800 in 0.5 M H<sub>2</sub>SO<sub>4</sub>.

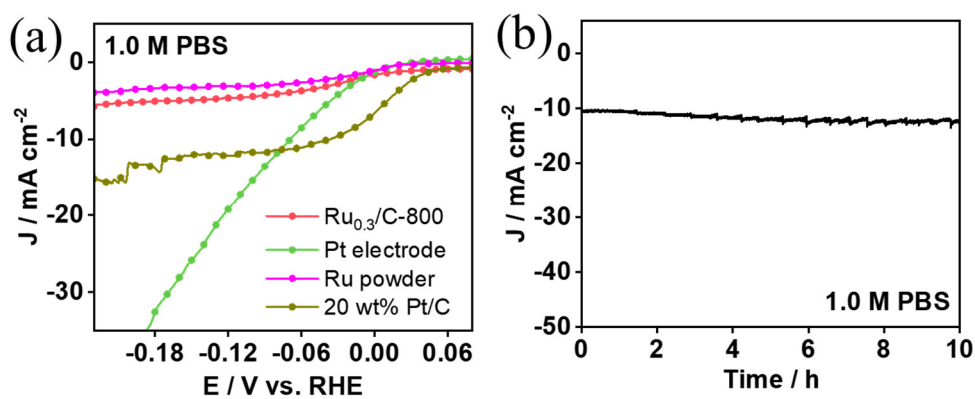

**Figure S16.** (a) LSV curves of Ru<sub>0.3</sub>/C-800, Ru powder, Pt electrode and 20 wt% Pt/C in 1.0 M PBS. (b) The i-t curve of Ru<sub>0.3</sub>/C-800 in 1.0 M PBS.
